# Supplementary material
Source: publisher site journal article supplement (https://static.cambridge.org/content/id/urn:cambridge.org:id:article:S2040174420000574/resource/name/S2040174420000574supp001.docx)
Supplement: Supplementary file 1 [file S2040174420000574supp001.docx]

**Supplementary figure-S1 : Determinants of stunting (Multiple logistic regression)**
